# Supplementary material for: Intermuscular adipose tissue in patients with systemic lupus erythematosus
Source: PubMed Central journal article supplement — Lupus Sci Med. 2022 Nov 22;9(1):e000756. doi: 10.1136/lupus-2022-000756 (PMC9684966; doi:10.1136/lupus-2022-000756), 2022-11-22
Supplement: lupus-2022-000756supp001.pdf [file lupus-2022-000756supp001.pdf]

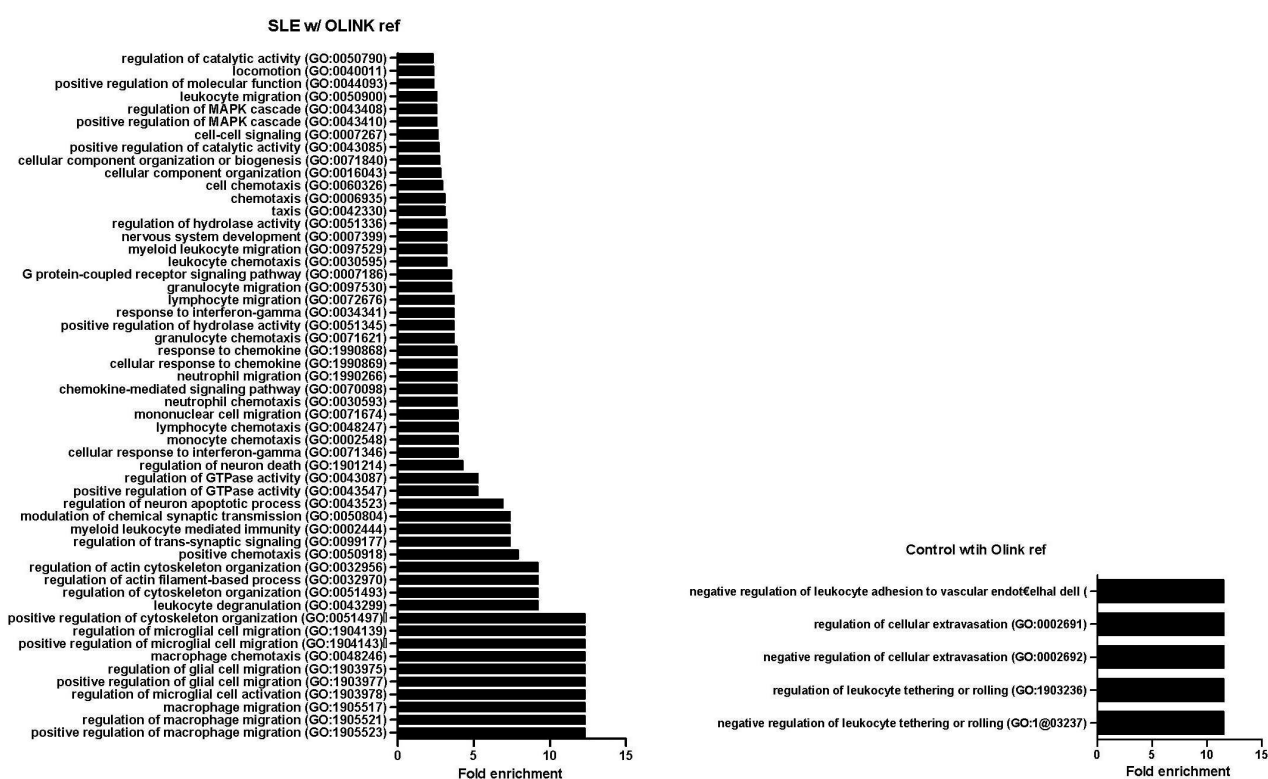

**Supplementary Figure 1.** Gene Ontology enrichment analysis showing the pathways associated with IMAT accumulation in patients with SLE (A) and controls (B).
